# Migrating Ovaries: Early Life Influences on Later Gonadal Function

Peter D. Gluckman\*, Alan S. Beedle

Progress in the biomedical and clinical sciences has relied heavily on experimental animal research. However, the impact of other comparative disciplines such as evolutionary biology, and in particular its subdisciplines of life history biology and ecological developmental biology, on human medicine has been limited. Despite its heritage and contributions, evolutionary biology has rarely been applied to understanding human development, particularly from a medical rather than an anthropological perspective.

Recently this gap in applying evolutionary biology to medicine has started to close, with a growing recognition that this discipline is critical to understanding the human condition and the risks of health and disease. Randolph Nesse and colleagues have proposed that evolutionary biology and “evolutionary medicine” should be a core discipline of medical training [1]. For example, evolutionary biology helps in understanding “lifestyle-associated” diseases such as type 2 diabetes mellitus [2]. Developmental plasticity, through the induction of a range of phenotypes from a single genotype in response to developmental cues, has a crucial role in determining the risk of such diseases [2]. The impetus for understanding the role of developmental biology in disease causation was the research by David Barker and colleagues who recognised the relationship between the conditions of the fetus as reflected in birth size and the later risk of disease [3]. This research in turn built on an early body of work, albeit somewhat less clear in its interpretation, relating the conditions of early life to later mortality (see [4] for review). A strong body of experimental studies has now linked the perinatal state to

The Perspectives section is for experts to discuss the clinical practice or public health implications of a published article that is freely available online.

## Linked Research Article

This Perspective discusses the following new study published in *PLoS Medicine*:

Núñez de la Mora A, Chatterton RT, Choudhury OA, Napolitano DA, Bentley GR (2007) Childhood conditions influence adult progesterone levels. *PLoS Med* 4(5): e167. doi:10.1371/journal.pmed.0040167

This migrant study involved first- and second-generation Bangladeshi women living in the UK, women still resident in Bangladesh, and women of European descent in the UK. The study found that women who spent their childhood in conditions of low energy expenditure, stable energy intake, good sanitation, low immune challenges, and good health care had higher levels of progesterone and an earlier maturation than women who developed in less optimal conditions.

later metabolic function (reviewed in [5]). Most recently, the role of epigenetic processes (environmentally sensitive modifications of the genome that allow stable transmission of gene expression states without alteration of the DNA sequence) in linking these early life events to later consequences, potentially crossing generations [6], has become apparent [7].

## Life History Trade-Offs and Reproductive Strategy

Life history theory is a framework developed to explain the very different strategies of growth, maturation, and reproduction used by different species across different environmental niches. The framework also attempts to explain the variation in reproductive and other strategies that individuals in a species may adopt, particularly when in different energetic states. Simply put, it posits that the organism must trade off its limited energetic capacity against different key components of its life course strategy so as to maximise the probability of gene flow to the next generation.

Selection acts on the mechanisms underlying this trade-off capacity. Important trade-offs affect patterns of reproductive and mating strategy as well as patterns of growth and relative investment in repair, and thus lifespan. There is an extensive theoretical basis for this approach (see, for example, [8]) supported by much empirical data, particularly in insects and amphibia.

In human biology, life history theory is applied to explain biodemographical observations such as patterns of reproduction and ageing, often obtained from studies in modern hunter-gatherer communities. In human females, trade-offs affecting reproductive strategy could emerge as differences in ages of menarche or menopause, in fecundity, or in inter-birth interval. For example, a recent study showed a trade-off between the age of menarche and mortality risk across a broad sample of hunter-gatherer societies [9]. Clearly, for most such trade-offs to operate they must be defined early in development. There is an emergent theory addressing how early life cues such as nutrition can influence phenotypic development and the expression of traits such as

**Funding:** The authors' research in this area is supported in part by the National Research Centre for Growth and Development.

**Competing Interests:** The authors declare that they have no competing interests, and that none of the funders played any role in the preparation of this article.

**Citation:** Gluckman PD, Beedle AS (2007) Migrating ovaries: Early life influences on later gonadal function. *PLoS Med* 4(5): e190. doi:10.1371/journal.pmed.0040190

**Copyright:** © 2007 Gluckman and Beedle. This is an open-access article distributed under the terms of the Creative Commons Attribution License, which permits unrestricted use, distribution, and reproduction in any medium, provided the original author and source are credited.

Peter D. Gluckman and Alan S. Beedle are at the Liggins Institute, The University of Auckland, Auckland, New Zealand.

\*To whom correspondence should be addressed. E-mail: pd.gluckman@auckland.ac.nz

elements of reproductive performance [10], operating through the processes of changed epigenetic expression [11].

Evidence for developmental effects of environment on mammalian reproductive strategy is increasing. For example, in sheep it is well documented that seasonality of birth (and thus, indirectly, nutrition) determines the timing of puberty [12]. In humans, it has been suspected for some time that there is a relationship between nutritional status in late childhood and the age of menarche. The now discredited Frisch hypothesis tried to tie menarche to a specific level of body fat, but evidence across populations links better nutritional status in late childhood to early menarche [13,14]. At the mechanistic level this link may well involve the interplay between the adipokine leptin and the neuroendocrine regulation of gonadotropin secretion [15]. Conversely, there is also evidence, from both experimental and epidemiological studies, that fetal undernutrition accelerates the age of menarche, particularly if later childhood nutrition is good [13,16,17]. This dichotomy can be seen within the same cohort, and in life history terms can be explained as two different maturational signals—that before birth signalling a later threatening world in which gene flow is protected by early reproductive competence, and a postnatal override that samples nutritional status as an indication of whether current energy provision is sufficient to sustain pregnancy.

This override or a similar mechanism also operates beyond puberty, as shown by the well-established relationship between energy balance and ovarian function in adult women [18]. The set point of this relationship can be modified by prenatal energetic constraints, since the ovarian function of women born thinner, and thus with predictive adaptations towards success in a harsher environment, is more sensitive to physical workload than that of women of greater fatness at birth [19].

### Further Evidence for Developmental Effects on Ovarian Function

In a new paper published in *PLoS Medicine*, Alejandra Núñez-de la Mora et al. [20] take the evidence for early life effects on later ovarian function a

step further. In a study of Bangladeshi migrants to the United Kingdom they evaluated adult luteal function (as indicated by salivary progesterone levels) and age at menarche. They compared groups who had migrated at different ages, had migrated in a previous generation, or had not migrated. While such studies are inevitably at risk of confounding factors such as current nutrition or workload, the authors made a credible attempt to control for these variables. They found a substantial effect: mature women who had migrated before the age of 8 years had higher luteal phase progesterone secretion than did those who migrated after that age. In this respect, the former group behaved like second-generation migrants and Europeans rather than women who had stayed in Bangladesh. The earlier the women had migrated as children, the earlier the age of menarche—supporting the general conclusion that good childhood conditions accelerate menarche.

This finding adds considerable weight to the utility of applying life history concepts to the study of human reproduction. Such perspectives may be important in understanding the conflict between the sociological drive to later first pregnancy and the declining fertility of older women, particularly those attempting their first pregnancy, who then must face the increased use of assisted reproductive technologies. Whether the conditions of early life are intertwined with the pattern of later reproductive decline merits further research.

### Clinical Implications

In the final part of their paper the authors speculate that the increased adult levels of progesterone experienced by younger migrants may play a role in the changing incidence of breast cancer. This is a rather broad extrapolation from their data, and there are many other possible explanations for the epidemiological observations. Yet there is other evidence associating early life events with the changing risk of breast cancer—larger babies have a greater risk of premenopausal breast cancer, for which several alternative mechanisms, including increased levels of intrauterine growth factors, have been proposed [21]. Thus, although

there may not be a direct causal link between progesterone levels and cancer incidence, the authors are indeed correct to point out that influences in fetal life, infancy, and childhood can affect not only later ovarian function but potentially the risk of reproductive malignancies.

This paper reminds us of the broader importance of considering early life effects in human medicine. The “developmental origins” model originally focused on the effect of prenatal nutrition on later risks of disease [3] and was later extended to show the compounding effects of both poor fetal growth and excessive infant growth [22]. The evidence is mounting that although the model is based on a disease outcome, it reflects normative mechanisms that have evolved to adjust the individual’s development to match the anticipated environment [2]. That paradigm is now being extended to include other components of phenotypic variation, including influences on gonadal and other endocrine function. The paper by Núñez-de la Mora et al. [20] underscores that variation in adult ovarian function, which might manifest as altered fertility and fecundity or perhaps as altered risk of hormone-associated disease, has a developmental component. Such fundamental biological perspectives have much to offer clinical medicine. ■

### References

1. Nesse RM, Stearns SC, Omenn GS (2006) Medicine needs evolution. *Science* 311: 1071.
2. Bateson P, Barker D, Clutton-Brock T, Deb D, D’Udine B, et al. (2004) Developmental plasticity and human health. *Nature* 430: 419–421.
3. Barker DJ, Osmond C (1986) Infant mortality, childhood nutrition, and ischaemic heart disease in England and Wales. *Lancet* 1: 1077–1081.
4. Kuh D, Davey Smith G (1997) The life course and adult chronic disease: An historical perspective with particular reference to coronary heart disease. In: Kuh D, Ben-Shlomo S, editors. *A life course approach to chronic disease epidemiology*. Oxford: Oxford University Press. pp. 15–41.
5. McMillen IC, Robinson JS (2005) Developmental origins of the metabolic syndrome: Prediction, plasticity, and programming. *Physiol Rev* 85: 571–633.
6. Gluckman PD, Hanson MA, Beedle AS (2007) Non-genomic transgenerational inheritance of disease risk. *Bioessays* 29: 149–154.
7. Burdge GC, Hanson MA, Slater-Jeffries JL, Lillycrop KA (2007) Epigenetic regulation of transcription: A mechanism for inducing variations in phenotype (fetal programming) by differences in nutrition during early life? *Br J Nutr*. E-pub 7 March 2007. doi:10.1017/S0007114507682920
8. Stearns SC, Koella JC (1986) The evolution

- of phenotypic plasticity in life-history traits: Predictions of reaction norms for age and size at maturity. *Evolution* 40: 893–913.
9. Walker R, Gurven M, Hill K, Migliano A, Chagnon N, et al. (2006) Growth rates and life histories in twenty-two small-scale societies. *Am J Hum Biol* 18: 295–311.
  10. Gluckman PD, Hanson MA, Spencer HG (2005) Predictive adaptive responses and human evolution. *Trends Ecol Evol* 20: 527–533.
  11. Gluckman PD, Hanson MA, Beedle AS (2007) Early life events and their consequences for later disease: A life history and evolutionary perspective. *Am J Hum Biol* 19: 1–19.
  12. Foster DL, Ebling FJP, Claypool LE, Woodfill CJ (1988) Cessation of long day melatonin rhythms time puberty in a short day breeder. *Endocrinology* 123: 1636–1641.
  13. Cooper C, Kuh D, Egger P, Wadsworth M, Barker D (1996) Childhood growth and age at menarche. *Br J Obstet Gynaecol* 103: 814–817.
  14. Garn SM (1987) The secular trend in size and maturational timing and its implications for nutritional assessment. *J Nutr* 117: 817–823.
  15. Tena-Sempere M (2006) KiSS-1 and reproduction: Focus on its role in the metabolic regulation of fertility. *Neuroendocrinol* 83: 275–281.
  16. Sloboda DM, Hart R, Doherty DA, Pennell CE, Hickey M (2007) Age at menarche: Influences of prenatal and postnatal growth. *J Clin Endocrinol Metab* 92: 46–50.
  17. Gluckman PD, Hanson MA (2006) Evolution, development and timing of puberty. *Trends Endocrinol Metab* 17: 7–12.
  18. Ellison PT (2003) Energetics and reproductive effort. *Am J Hum Biol* 15: 342–351.
  19. Jasienska G, Thune I, Ellison PT (2006) Fatness at birth predicts adult susceptibility to ovarian suppression: An empirical test of the Predictive Adaptive Response hypothesis. *Proc Natl Acad Sci U S A* 103: 12759–12762.
  20. Núñez de la Mora A, Chatterton RT, Choudhury OA, Napolitano DA, Bentley GR (2007) Childhood conditions influence adult progesterone levels. *PLoS Med* 4: e167. doi:10.1371/journal.pmed.0040167
  21. Michels KB, Xue F (2006) Role of birthweight in the etiology of breast cancer. *Int J Cancer* 119: 2007–2025.
  22. Barker DJ, Osmond C, Forsen TJ, Kajantie E, Eriksson JG (2005) Trajectories of growth among children who have coronary events as adults. *N Engl J Med* 353: 1848–1850.

What if I can't afford  
publication charges?

We realize that not everyone who does medical research can afford to pay publication charges through their grants. PLoS waives those fees, no questions asked, for anyone who can't pay. Our editors and peer reviewers have no knowledge of who can pay, so papers are accepted only on their merit.

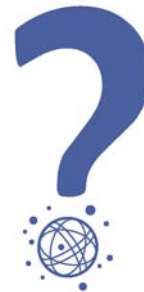

Source: https://eprints.soton.ac.uk/61157/1/fetchObject.action_uri%253Dinfo_doi%25252F10.1371%25252Fjournal.pmed.0040190%2526representation%253DPDF
